# Supplementary material for: TIMP-1 Is Overexpressed and Secreted by Platinum Resistant Epithelial Ovarian Cancer Cells
Source: Cells. 2019 Dec 18;9(1):6. doi: 10.3390/cells9010006 (PMC7016675; doi:10.3390/cells9010006)
Supplement: Supplementary file 1 [file cells-09-00006-s001.pdf]

## Supplementary Information

A

| Spot Position | Target                    | Spot Position | Target                  |
|---------------|---------------------------|---------------|-------------------------|
| A1-2          | Reference spot            | C17-18        | IL-8                    |
| A5-6          | Activin A                 | C19-20        | LAP (TGFβ1)             |
| A7-8          | ADAMTS-1                  | C21-22        | Leptin                  |
| A9-10         | Angiogenin                | C23-24        | MCP-1                   |
| A11-12        | Angiopoietin-1            | D1-2          | MIP-1α                  |
| A13-14        | Angiopoietin-2            | D3-4          | MMP-8                   |
| A15-16        | Angiostatin/Plaminogen    | D5-6          | MMP-9                   |
| A17-18        | Anphiregulin              | D7-8          | NGR1-β1                 |
| A19-20        | Artemin                   | D9-10         | Pentraxin 3 (PTX3)      |
| A23-24        | Reference spot            | D11-12        | PD-ECGF                 |
| B1-2          | Coagulation Factor III    | D13-14        | PDGF-AA                 |
| B3-4          | CXCL16                    | D15-16        | PDGF-AB/PDGF-BB         |
| B5-6          | DPPIV                     | D17-18        | Persephin               |
| B7-8          | EGF                       | D19-20        | Platelet Factor 4 (PF4) |
| B9-10         | EG-VEGF                   | D21-22        | PIGF                    |
| B11-12        | Endoglin                  | D23-24        | Prolactin               |
| B13-14        | Endostatin/Collagen XVIII | E1-2          | Serpin B5               |
| B15-16        | Endothelin-1              | E3-4          | Serpin E1               |
| B17-18        | FGF acid                  | E5-6          | Serpin F1               |
| B19-20        | FGF basic                 | E7-8          | TIMP-1                  |
| B21-22        | FGF-4                     | E9-10         | TIMP-4                  |
| B23-24        | FGF-7                     | E11-12        | Thrombospondin-1        |
| C1-2          | GDNF                      | E13-14        | Thrombospondin-2        |
| C3-4          | GM-CSF                    | E15-16        | uPA                     |
| C5-6          | HB-EGF                    | E17-18        | Vasohibin               |
| C7-8          | HGF                       | E19-20        | VEGF                    |
| C9-10         | IGFBP-1                   | E23-24        | VEGF-C                  |
| C11-12        | IGFBP-2                   | F1-2          | Reference spot          |
| C13-14        | IGFBP-3                   | F23-24        | Negative Control        |
| C15-16        | IL-1β                     |               |                         |

B

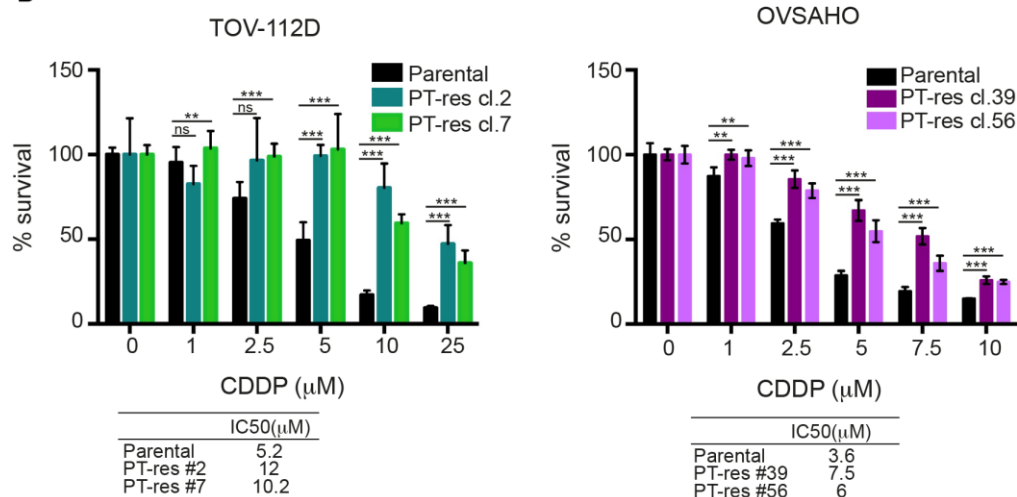

**Supplementary Figure S1. Characterization of cisplatin response in the used PT-res clones.**

A) Schematic table reporting the cytokines, and their relative positions on the array used in Figure 1. B) Graphs reporting cell viability of TOV-112D (left) and OVSAHO (right) parental and PT-res clones treated with increasing doses of cisplatin (CDDP) for 72 hours. Data report the percentage of viable cells with respect to the untreated cells and represent the mean ( $\pm$ SD) of three independent experiments. The tables under the graphs show the IC50 of CDDP for

each cell line. Statistical significance was determined by a two-tailed, unpaired Student's t test (\*\*p < 0.01, \*\*\*p < 0.001).

A

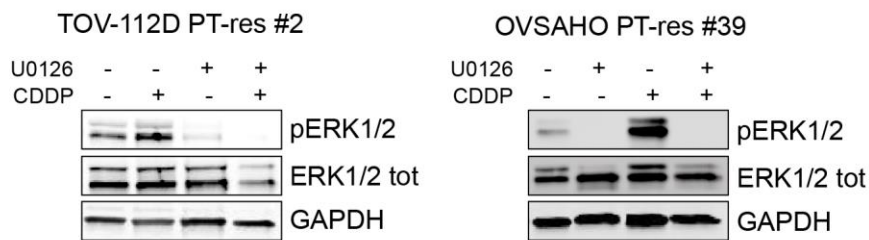

B

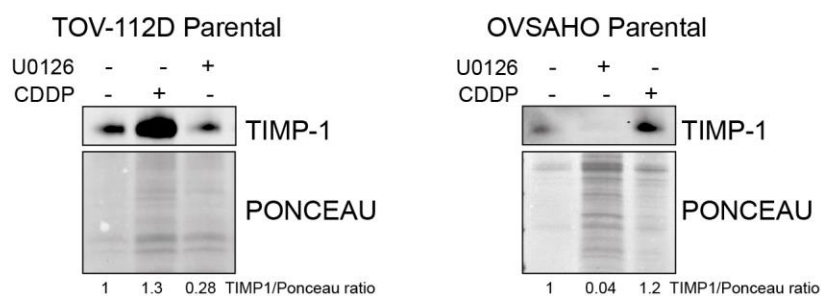

C

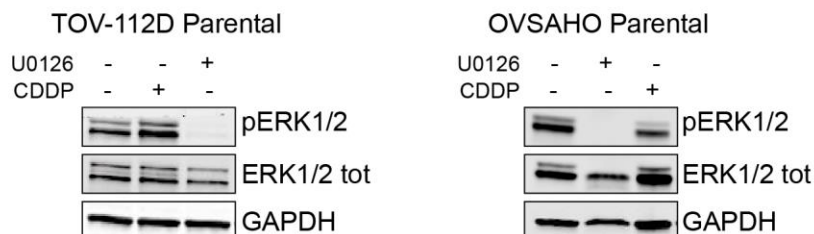

**Supplementary Figure S2. TIMP-1 expression is downregulated by MEK inhibitors.** A) Western blot analysis of pERK1/2 and ERK1/2 total expression in whole lysates of TOV-112D and OVSAHO PT-res clones treated with U0126 10  $\mu$ M in combination or not with CDDP (15  $\mu$ M for TOV-112D and 10  $\mu$ M for OVSAHO) for 24 hours. B) Western blotting analysis of TIMP-1 expression from CM of indicated parental EOC cells treated for 24 hours with CDDP (15  $\mu$ M for TOV-112D and 10  $\mu$ M for OVSAHO) or U0126 10  $\mu$ M for 24 hours. The lower panels show the Ponceau staining of the nitrocellulose membranes to check the levels of protein input. Densitometric analysis of TIMP-1 expression (normalized to Ponceau) is reported under the blot. C) Western blot analysis of pERK1/2 and ERK1/2 total expression in whole lysates of TOV-112D and OVSAHO described in B. In A and C GAPDH was used as loading control

A

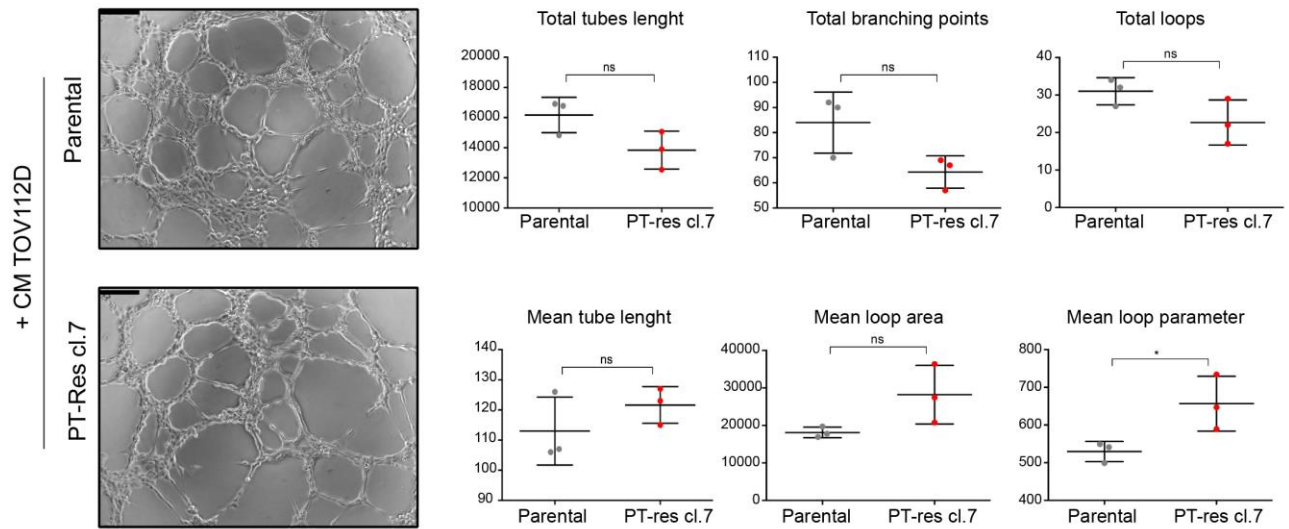

B

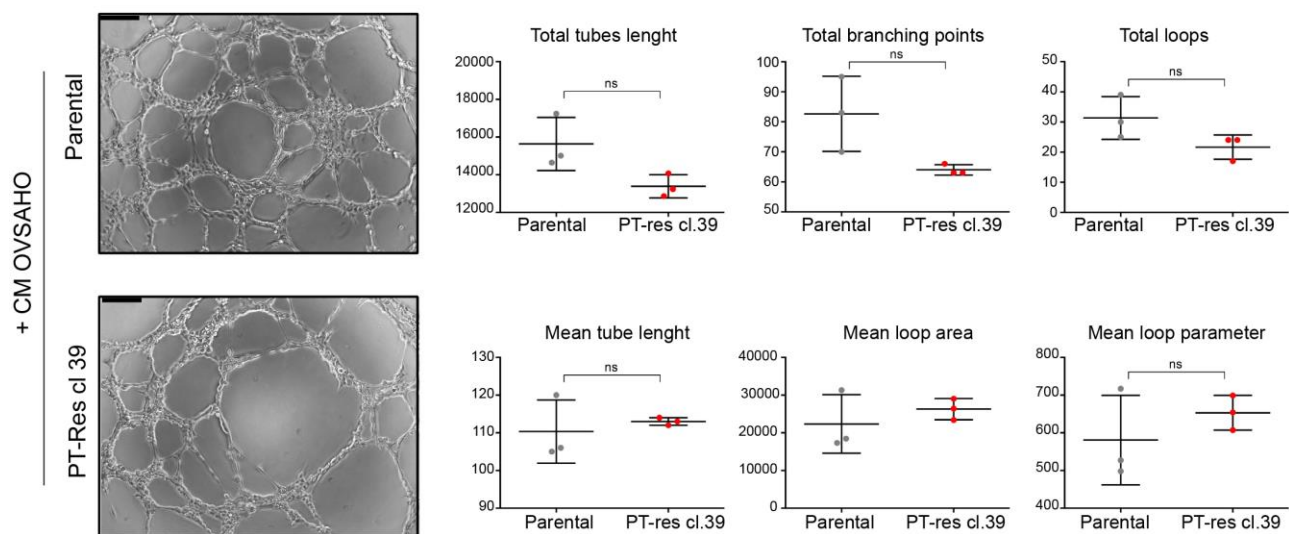

**Supplementary Figure S3. Effects of Conditioned Medium of Parental and PT-res cells on the tube forming activity of HUVEC.** A) Left, representative images of the tubes formed by HUVEC cells seeded on Matrigel and challenged with CM from parental and PT-res TOV-112D cells (clone 7); scale bar 150 $\mu$ m. Right, graphs reporting the evaluation of the total tube length, total branching points, total loops, mean tube length, mean loop area and mean loop perimeter, as obtained with the Wimasis software; P values were obtained using the paired Student's t-test; \*  $P < 0.05$ , ns: not significant. B) Left, representative images of the tubes formed by HUVEC cells seeded on Matrigel and challenged with CM from parental and PT-res OVS-112D cells (clone 39); scale bar 150 $\mu$ m. Right, graphs reporting the evaluation of the total tube length, total branching points, total loops, mean tube length, mean loop area and mean loop perimeter, as obtained with the Wimasis software; P values were obtained using the paired Student's t-test; ns: not significant.

A

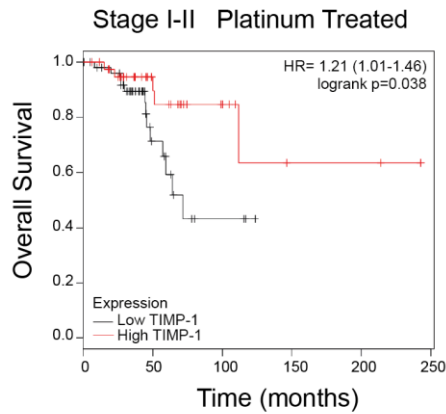

B

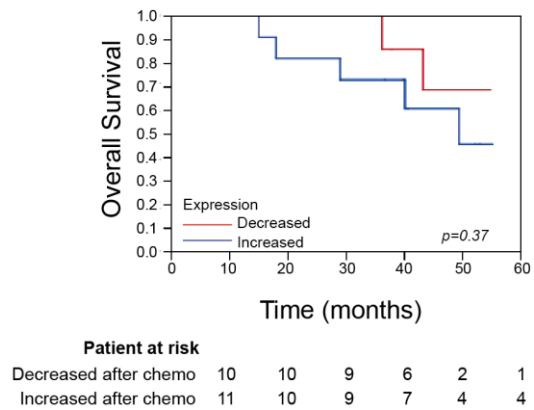

**Supplementary Figure S4. High TIMP-1 expression predicts prognosis in EOC patients.** A) Kaplan-Meier survival curve evaluating the OS of stage I-II EOC patients treated with platinum (n=93) stratified for TIMP-1 expression.  $p$  value is reported in the plot; HR = Hazard Ratio and CI = Confidence Interval. B) Kaplan Meyer curve evaluating the overall survival of EOC patients (n=21) stratified on the increased or decreased of TIMP-1 circulating RNA expression of coupled plasma samples. In A and B the  $p$  values were calculated using the log-rank test.
